# Supplementary material for: Arginine mimetic appended peptide-based probes for fluorescence turn-on detection of 14-3-3 proteins
Source: Royal Society of Chemistry journal article supplement (doi:10.1039/c9ob00620f), 2019-01-01
Supplement: c9ob00620f2.pdf [file c9ob00620f2.pdf]

There is only one supplementary information file available for this article. Please see the other link.
